# Supplementary material
Source: PubMed Central journal article supplement (PMC2581980)
Supplement: blood-2007-09-111500_1.pdf [file blood-2007-09-111500_1.pdf]

| Parameter               | 4 weeks   |                          |          | 24 weeks   |                         |          |
|-------------------------|-----------|--------------------------|----------|------------|-------------------------|----------|
|                         | +/<br>n=9 | <i>hem6/hem6</i><br>n=10 | <i>P</i> | +/<br>n=10 | <i>hem6/hem6</i><br>n=9 | <i>P</i> |
| <b>Body Weight (BW)</b> | 15.9±2.1  | 13.1±2.4                 | .428     | 28.7±6.1   | 25.6±3.9                | .204     |
| <b>Liver:BW</b>         | 42.9±2.3  | 44.7±3.8                 | .271     | 37.0±3.5   | 42.8±7.0                | .045     |
| <b>Spleen:BW</b>        | 4.6±1.2   | 5.9±2.2                  | .741     | 2.3±0.5    | 2.9±1.1                 | .208     |
| <b>Kidneys:BW</b>       | 12.1±1.1  | 12.4±1.0                 | .055     | 11.3±1.8   | 13.0±1.7                | .047     |
| <b>Testes:BW</b>        | 6.7±0.7   | 8.5±1.1                  | .049     | 7.7±1.4    | 9.5±1.3                 | .084     |
| <b>Thymus:BW</b>        | 4.8±0.9   | 5.1±0.9                  | .310     | 1.8±0.6    | 1.6±0.4                 | .407     |
| <b>Heart:BW</b>         | 4.9±0.3   | 5.5±0.4                  | .316     | 4.7±0.4    | 5.0±0.8                 | .221     |
