# Supplementary material
Source: PubMed Central journal article supplement (PMC2581980)
Supplement: blood-2007-09-111500_2.pdf [file blood-2007-09-111500_2.pdf]

| Parameter                | 4 weeks    |                  |          | 24 weeks   |                  |          |
|--------------------------|------------|------------------|----------|------------|------------------|----------|
|                          | <i>+/+</i> | <i>hem6/hem6</i> | <i>P</i> | <i>+/+</i> | <i>hem6/hem6</i> | <i>P</i> |
| Serum iron, µg/dL        | 228±142    | 168±43           | .455     | 186±105    | 525±779          | .240     |
| TIBC, µg/dL              | 572±266    | 429±61           | .152     | 580±200    | 966±938          | .280     |
| Transferrin saturation,% | 37±8       | 37±8             | .607     | 32±11      | 40±21            | .450     |
| Liver Iron, µg/g         | 94±25      | 109±33           | .283     | 121±51     | 98±32            | .251     |
| Spleen iron, µg/g        | 74±21      | 106±23           | .008     | 1456±1052  | 936±933          | .054     |
| Total spleen iron, µg    | 3.1±1.1    | 5.0±2.3          | .033     | 71±55      | 44±53            | .249     |
