# Supplementary material
Source: PubMed Central journal article supplement (PMC2581980)
Supplement: blood-2007-09-111500_3.pdf [file blood-2007-09-111500_3.pdf]

| Parameter                   | A            | B                   | C                        | P (A vs B) | P (A vs C) |
|-----------------------------|--------------|---------------------|--------------------------|------------|------------|
|                             | + → +<br>n=5 | <i>hem6</i> → + n=6 | + → / <i>hem6</i><br>n=6 |            |            |
| WBCs, x 10 <sup>3</sup> /μL | 12.7±2.4     | 13.2±1.4            | 13.9±1.5                 | .335       | .343       |
| RBCs, x 10 <sup>6</sup> /μL | 8.8±0.5      | 11.42±1.2           | 9.7±0.6                  | <.001      | .012       |
| Hemoglobin, g/dL            | 11.76±1.0    | 10.73±1.1           | 12.9±1.0                 | .070       | .074       |
| Hematocrit,%                | 46.2±2.1     | 47.8±4.4            | 49.9±3.4                 | .224       | .042       |
| MCV,fL                      | 52.4±2.1     | 41.9±0.7            | 51.2±1.2                 | <.001      | .321       |
| MCH,pg                      | 13.4±1.1     | 9.5±0.2             | 13.3±0.6                 | <.001      | .891       |
| MCHC,g/dL                   | 25.5±1.1     | 22.6±0.7            | 25.9±0.9                 | <.001      | .462       |
| RDW,%                       | 14.1±1.2     | 16.8±0.9            | 14.8±1.2                 | .002       | .382       |
| MPV,fL                      | 7.3±0.2      | 7.1±0.2             | 6.9±0.3                  | .101       | .029       |
| Reticulocytes,%             | 2.6±0.4      | 2.1±0.2             | 3.4±0.9                  | .015       | .064       |
| CHr,pg                      | 14.0±0.7     | 11.6±0.2            | 14.2±0.8                 | <.001      | .612       |
| ZnPP/H, μmol/mol            | 112±19       | 64±5                | 139±74                   | .002       | .392       |
