# Supplementary material
Source: PubMed Central journal article supplement (PMC2581980)
Supplement: blood-2007-09-111500_4.pdf [file blood-2007-09-111500_4.pdf]

| <b>Parameter</b>                     | <b><i>hem6/ hem6<br/>fech/fech<br/>(n=5)</i></b> | <b><i>?/+<br/>fech/fech<br/>(n=4)</i></b> | <b><i>hem6/hem6<br/>?/+<br/>(n=4)</i></b> | <b><i>?/+<br/>?/+<br/>(n=21)</i></b> |
|--------------------------------------|--------------------------------------------------|-------------------------------------------|-------------------------------------------|--------------------------------------|
| <b>WBCs × 10<sup>3</sup>/μL</b>      | 10.15±2.42                                       | 10.96±3.72                                | 11.96±1.79                                | 8.15±2.68                            |
| <b>RBCs × 10<sup>6</sup>/μL</b>      | 10.72±0.60                                       | 9.39±1.53                                 | 11.06±0.37                                | 8.55±0.73                            |
| <b>Hemoglobin g/dL</b>               | 10.6±0.7                                         | 12.1±1.1                                  | 11.7±0.6                                  | 14.0±1.3                             |
| <b>Hematocrit %</b>                  | 46.6±2.0                                         | 46.8±7.3                                  | 48.2±2.1                                  | 48.2±3.5                             |
| <b>MCV fL</b>                        | 43.6±2.4                                         | 49.9±1.9                                  | 43.5±0.7                                  | 56.4±3.7                             |
| <b>MCH,pg</b>                        | 9.9±0.5                                          | 12.9±1.0                                  | 10.6±0.5                                  | 16.4±1.8                             |
| <b>MCHC,g/dL</b>                     | 22.8±0.7                                         | 26.0±2.4                                  | 24.4±1.4                                  | 29.0±2.4                             |
| <b>RDW,%</b>                         | 18.9±1.7                                         | 21.0±0.9                                  | 17.4±0.2                                  | 13.8±1.2                             |
| <b>Platelets, ×10<sup>6</sup>/μL</b> | 1142±128                                         | 1290±229                                  | 985±116                                   | 959±106                              |
| <b>MPV,fL</b>                        | 7.8±0.4                                          | 8.4±0.7                                   | 7.7±0.4                                   | 8.1±0.5                              |
| <b>Reticulocytes,%</b>               | 4.98±1.58                                        | 4.18±1.62                                 | 3.78±1.48                                 | 3.65±2.07                            |
| <b>Abs retic, ×10<sup>6</sup>/μL</b> | 0.530±0.160                                      | 0.379±0.126                               | 0.367±0.235                               | 0.299±0.189                          |
| <b>CHr, pg</b>                       | 12.5±0.5                                         | 14.2±1.1                                  | 12.7±0.4                                  | 15.6±0.8                             |
| <b>ZnPP/H, μmol/mol</b>              | 240±112                                          | 176±11                                    | 119±16                                    | 204±89                               |
| <b>Fluorocytes, %</b>                | 2.5±1.9                                          | 25.8±14.1                                 | 0.0±0.0                                   | 0.2±0.2                              |
